# Supplementary material
Source: publisher figshare collection journal article supplement (https://springernature.figshare.com/ndownloader/files/20373405)
Supplement: Supplementary file 1 [file 20373405]

*Additional file 3 – Statistical significance of One-Way Repeated-Measures ANOVA comparing the food consumption of the cats every hour.*
